# Supplementary material
Source: PubMed Central journal article supplement (PMC2593726)

## Electronic Supplementary Materials

### Materials and Methods

DNA extraction procedures were as described by Pellmyr et al. (2007). PCR reactions were performed in 30  $\mu$ l reaction volumes, with 0.3  $\mu$ L of 10  $\mu$ M primers and 0.6  $\mu$ L of 10 mM dNTP mixture, 3  $\mu$ L of 10X reaction buffer, and 1.5 units of Fisher brand Taq polymerase. MgCl<sub>2</sub> and template volumes varied depending on the primers used for amplification (Table S1). PCR reactions were performed in an MJ Research PTC-100 thermal cycler. For all gene regions except the rps16 intron, sequences were amplified using standard PCR conditions (see Table S1 for primer-specific annealing temperatures). The rps16 intron was amplified using a touchdown procedure, with a starting annealing temperature of 56°C and a final annealing temperature of 42°C.

PCR reactions were analyzed by electrophoresis in 2% agarose gels stained with ethidium bromide and visualized using a UV light trans-illuminator. Successful PCR reactions were purified using QIAquick PCR Purification Kits (© 2002, Qiagen Corporation).

Sequencing of purified PCR products followed Althoff et al (2006).

Raw sequence data were edited in Sequencher v. 4.1.2 (GeneCodes Corporation, Ann Arbor, MI). Multiple sequence alignment was completed in Clustal W using a gap opening penalty = 15 and a gap extension penalty = 6.66.

**Phylogenetic analysis-** Aligned sequences were concatenated in Mesquite v. 1.11 (Maddison & Maddison 2006). Indels were recoded by hand as presence/absence data according to the procedure described by Simmons and Ochoterena (2000). Tandem repeats were recoded as ordered, multi-state characters.

Data were analyzed using Bayesian inference. Analyses were executed in MrBayes v. 3.1.2 (Huelsenbeck & Ronquist 2001). All runs were implemented using two replicate runs, with 8 chains (7 heated, 1 unheated) and the temperature parameter set to 0.1. The program was set to terminate when the standard deviation of split frequencies between replicates reached  $< 0.01$ . Post-burn-in trees were sampled every 1000 generations, and the Bayes consensus of these trees was calculated including all compatible subgroupings using SumT.

Analysis of AFLP data used a one-parameter, k-state model for standard data (Lewis 2001). Datasets that combined DNA sequences with AFLP or indel data used a partitioned model; the indel, tandem repeat, and AFLP data were analyzed under Lewis's model for standard data, and the DNA sequence data were analyzed under the K81+G model, selected by hierarchical likelihood ratio tests (HLRT) implemented in ModelTest v. 3.7 (Posada & Crandall 1998).

Support for the resultant topologies was assessed by calculating clade posterior probabilities, and by non-parametric bootstrapping under a maximum parsimony criterion. Non-parametric bootstrapping was conducted in PAUP\* v. 4.0b10 (Swofford 2002) creating 1000 bootstrap replicates per dataset, using heuristic searches starting from random trees, with 100 addition sequence replicates, saving no more than 500 (153-taxa dataset) or 1000 (smaller datasets) trees per replicate.

***Assessing conflicts between data partitions*** - Inferring the age of clades using relaxed clock methods requires that the genes used to infer those ages accurately reflect the phylogenetic history of the organisms. Within *Yuccas*, it has been suggested that occasional introgression of chloroplast genomes between species may obscure true phylogenetic relationships (Hanson

1993). For this reason, we tested for chloroplast introgression between lineages within *Yucca* prior to estimating ages.

Because the AFLP data represent a snapshot of overall genetic similarity sampled from across the entire genome, we consider the AFLP topology to be the best available reconstruction of the true phylogenetic relationships. Unfortunately, high rates of homoplasy, and a lack of sufficient models to describe the evolution of AFLP markers make it problematic to infer molecular clock estimates from the AFLP data directly. However, by identifying areas of conflict between the AFLP and chloroplast sequence data, we can eliminate putatively introgressed taxa and then infer clock estimates from sequence data, using only samples where introgression could be definitively ruled out.

We used four methods to quantify differences between the AFLP and cpDNA data partitions. First, to examine overall disagreement between partitions in the 83-taxa (i.e., only those taxa with data from both partitions), we used an incongruence length difference (ILD) test using 100 random partitions. Second, to identify conflict localized in specific nodes, we computed the partitioned Bremer support indices (Baker & DeSalle 1997) for nodes found in a combined parsimony analysis of the two data partitions and for nodes in the Bayes consensus trees derived from the AFLP and cpDNA sequence data analyzed separately. Partitioned Bremer supports were calculated using TreeRot v2 (Sorenson 1999) and PAUP v4.0B10. Search strategies were the same for both the initial unconstrained search and the constrained searches used to evaluate support for each node in the respective trees. Because PAUP does not currently implement a maximum likelihood model for standard data (such as AFLPs), the partitioned Bremer supports were calculated under a parsimony criterion only.

Next, to evaluate the statistical evidence for conflict between data partitions in a Bayesian context, we filtered the post-burn-in trees produced from the separate MrBayes analyses of the cpDNA and AFLP datasets, retaining only trees compatible with the topologies inferred from the AFLP or cpDNA datasets, respectively. The proportion of the trees retained is approximately equal to the probability that gene tree and species (AFLP) tree are identical (Stevens 2004).

Finally, to identify areas of significant *agreement* between data partitions, we used the program ParaFit to evaluate topological congruence between the Bayes consensus trees inferred from the AFLP and cpDNA dataset analyzed separately. Although ParaFit was originally developed to compare host and parasite trees (Legendre et al. 2002), several phylogenetic systematists have pointed out that because many underlying processes in host-parasite interactions are directly analogous to processes in molecular evolution, methods developed for cospeciation studies also have utility for comparing gene trees with species trees (Charleston & Perkins 2006; Doyle 1997; Maddison 1997; Page & Charleston 1998; Ronquist 1997). ParaFit in particular is often used in place of other traditional methods for cospeciation analysis that can be extremely computationally intensive (Charleston & Perkins 2006; Legendre et al. 2002; Page & Charleston 1998), and has recently been applied to comparing gene trees and species trees (Penton & Crease 2004) to test for horizontal transfer of genetic elements between species.

We considered the two datasets to agree on the placement of a particular taxon if the match between the AFLP and cpDNA datasets for that taxon made a significant ( $p < 0.05$ ) contribution to the overall level of congruence between the topologies, under both the ParaFitLink1 and ParaFitLink2 statistics. Following Legendre et al. (2002) those taxa that did

not show a significant match were removed. We treated the AFLP topology as the ‘host’ phylogeny, and the cpDNA topology as the ‘parasite’ phylogeny, but because we accepted only taxa for which both ParaFitLink statistics were significant, this distinction is inconsequential. The AFLP and cpDNA sequence data from the remaining taxa (see Table S3 and Fig. 4) were analyzed both together and separately in MrBayes and PAUP (above) to estimate a topology and compute clade posterior probabilities and non-parametric bootstrap supports. Age estimates for relationships within *Yucca* were inferred using r8s (see ‘Divergence time and mutation rate estimates,’ below) from the sequence data, using the Bayes consensus topology estimated from the combined, conflict-free dataset.

***Divergence time and mutation rate estimates-*** Divergence times and mutation rates were estimated from the Bayes consensus trees for the Asparagales (153-taxa) dataset and the conflict-free (46-taxa) *Yucca* dataset. Because of the problems associated with inferring clock estimates from AFLP data, described above, branch lengths were calculated for the latter topology using the sequence data alone in PAUP. Because likelihood ratio tests strongly rejected the presence of a molecular clock for both datasets ( $p < 0.001$ ), divergence times were estimated using penalized likelihood in r8s v. 1.71 (Sanderson 1997; Sanderson 2002). Divergence times within the Asparagales were calibrated by constraining the age of the monocotyledons to be between 105.5 (Magallón & Sanderson 2001) and 139 MY (Sanderson & Doyle 2001), and the age of the Asparagales to be between 37.5 MY (Magallón & Sanderson 2001) and 94 MY (Wikström et al. 2001). Divergence times within *Yucca* were calibrated by setting the age of the common ancestor of *Sarcocarpa* and *Chaenocarpa* to be between 6.06 and 6.81 MY, the age range inferred from the r8s analysis of the Asparagales (153-taxa) dataset. Optimal smoothing values were determined by cross-validation using 100 different parameter

values, and the correctness of solutions was determined using “checkgradient”, with 10 different starting conditions. To account for uncertainty in phylogenetic inference, we profiled divergence time estimates for nodes of interest across 100 post-burn-in trees, sampled every 80,000 generations (153-taxa dataset) or every 18,000 generations (46-taxa dataset).

Mutation rates and standard errors were estimated in r8s, averaging across all branches, across 100 post-burn-in trees. Locus-specific substitution and insertion/deletion rates within *Yucca* were computed by re-estimating branch lengths for the post-burn-in trees using either parsimony (for indel data) or maximum likelihood (for DNA sequence data). Maximum-likelihood models used the mean parameter values estimated in the Bayesian analysis. To account for uncertainty in calibration for the age of *Yucca*, we calculated the range of possible mutation rates assuming that the age of the ingroup was either 6.41 MY (Bayes consensus) or 10.19 MY (mean age profiled across post-burn-in trees).

**Comparisons of diversification rates-** We used two approaches to compare rates of speciation in *Yucca* and *Agave*. First, because *Yucca* (*Yucca sensu stricto* + *Y. queretaroensis*) and *Agave sensu latissimus* (*Agave*, *Beschorneria*, *Furcraea*, *Manfreda*, *Polianthes*, and *Prochnyanthes*) were found to be sister-groups (see Results), relative species diversity can be compared directly. We assume that there are 240 species within *Agave s. latissimus* – (166 species of *Agave*, 7 of *Beschorneria*, 25 of *Furcraea*, 28 of *Manfreda*, 13 of *Polianthes*, and one of *Prochnyanthes*) (Good-Avila et al. 2006) and 34 species of *Yucca*, including *Yucca queretaroensis* (Pellmyr et al. 2007). Although Good-Avila et al (2006) compared speciation rates in *Yucca* with those in *Agave sensu lato* (*Agave* + *Polianthes* + *Prochnyanthes*), by using the *Agave s. latissimus* we could make a robust sister-group comparison.

Differences in the total numbers of species between these sister groups were compared using Slowinski & Guyer's (1989) method. The hypothesis that these groups differ in speciation rates was also tested using a likelihood ratio test, assuming a chi-squared distribution and one degree of freedom (Sanderson & Donoghue 1994) .

Both of the preceding tests consider only differences in total species numbers between clades (see discussion in Schluter (2000)), so in a second approach that incorporates information about phylogeny, we calculated rates of speciation under a Yule model as described by Baldwin & Sanderson (1998). We use the number of species of each group included in the trnL-trnF dataset (33 for *Agave s. latissimus* and 34 for *Yucca*); total tree length was calculated from the trnL-trnF Bayes consensus tree for *Agave s. latissimus*, and *Yucca*. Because including multiple individuals of any given species would inflate the total tree length, trees were pruned to include only one representative from each species: within the *Agave* lineage only one species was represented by multiple individuals; within *Yucca*, individuals were selected for pruning to maximize the congruence with the AFLP topology. The pruned topologies are shown in figure S2, below. Total tree lengths were calculated using TreeStat v. 1.1 (Rambaut & Drummond 2005)

Finally, changes in diversification rates were calculated using Pybus's gamma statistic (Pybus et al. 2002) for these same topologies. The gamma statistic is influenced both by diversification rates and by incomplete taxon sampling, so we estimated the expected distribution of the gamma statistics using data simulations. Simulations were completed in Phyl-O-Gen v. 1.1 (Rambaut 2002), under a pure birth model sampling 33 of 240 species for *Agave s. latissimus* and all 34 species for *Yucca*. One thousand trees were simulated for each genus, and gamma statistics were calculated using TreeStat v. 1.1 (Rambaut & Drummond 2005). Rates of

diversification were visualized by drawing lineages-through-time plots for each of these groups.



**Table S1:** Primers used in this study and PCR conditions. Primer pairs are alternately shaded / unshaded to indicate primers used together.

| Primer Name                        | Sequence                    | Target Region | Used In         | Annealing Temperature | Volume MgCl <sub>2</sub> | Volume Genomic DNA |
|------------------------------------|-----------------------------|---------------|-----------------|-----------------------|--------------------------|--------------------|
| 113105-for <sup>1</sup>            | TCAACGTGTCGATTCCAATCCTATCT  | clpP intron2  | PCR             | 55                    | 1uL                      | 4uL                |
| 113720-rev <sup>1</sup>            | AAAATCAAGTATCCAGGCTCCGTTC   | clpP intron2  | PCR             | 55                    | 1uL                      | 4uL                |
| 113290-for <sup>1</sup>            | TTCGTCGAGATTCAAATCACG       | clpP intron2  | Sequencing      | 60                    | NA                       | NA                 |
| 113523-rev <sup>1</sup>            | GGGTGATCTCAAACGCCATGC       | clpP intron2  | Sequencing      | 60                    | NA                       | NA                 |
| rps16-ex1-for <sup>2</sup>         | CGTTTGAAACGATGTGGTAG        | rps16 intron  | PCR, Sequencing | Touchdown: 56-42      | 2uL                      | 3uL                |
| rps16-ex2-rev <sup>3</sup>         | CGTATCGGATCGTAAAAACCTAC     | rps16 intron  | PCR, Sequencing | Touchdown: 56-42      | 2uL                      | 3uL                |
| rps16-for-alt <sup>1</sup>         | CACCATTTTCTATAGGAATGAAGATGC | rps16 intron  | PCR, Sequencing | Touchdown: 56-42      | 1uL                      | 2uL                |
| rps16-rev-alt <sup>1</sup>         | CGATAGATCGCTCATTGGGATAGATGT | rps16 intron  | PCR, Sequencing | Touchdown: 56-42      | 1uL                      | 2uL                |
| trnL-for <sup>4</sup>              | CGAAATCGGTAGACGCTACG        | trnL-trnF     | PCR, sequencing | 47-50                 | 2uL                      | 3uL                |
| trnL-F-rev <sup>4</sup>            | ATTTGAACTGGTGACACGAG        | trnL-trnF     | PCR, sequencing | 47-50                 | 2uL                      | 3uL                |
| trnT-L-internal-for-2 <sup>1</sup> | TACATTATCATTATAGATAATATACG  | trnT-trnL     | PCR, sequencing | 53                    | 3.5                      | 5uL                |
| trnL-rev                           | GGGATAGAGGGACTTGAAC         | trnT-trnL     | PCR, sequencing | 53                    | 3.5                      | 5uL                |
| trnS-T-for <sup>5</sup>            | CGAGGGTTCGAATCCCCTCTC       | trnT-trnL     | PCR, sequencing | 52                    | 3.5                      | 5uL                |
| trnT-L-int-rev <sup>1</sup>        | TACTTTTCTTAGAACCGATCCGC     | trnT-trnL     | PCR, sequencing | 52                    | 3.5                      | 5uL                |
| trnS-T-rev                         | AGAGCATCGCATTCTAATG         | trnT-trnL     | Sequencing      | 60                    | NA                       | NA                 |
| trnT-for <sup>3</sup>              | CGATGACCCTCGCATTAC          | trnT-trnL     | PCR, sequencing | 53                    | 2uL                      | 3.5uL              |
| trnL-ex1-rev <sup>3</sup>          | AAGTCCGTAGCGTCTACC          | trnT-trnL     | PCR, sequencing | 53                    | 2uL                      | 3.5uL              |

1 Designed by CIS

2 (Downie &amp; Katz-Downie 1999)

3 Designed by JLM

4 (Taberlet et al. 1991)

5 (Demesure et al. 1995)

**Table S2: Collections Data and GenBank Accessions. Locality information and botanical authorities are provided for data first published here.**

| <b>Species</b>                 | <b>Author</b> | <b>Collection</b> | <b>Locality</b> | <b>Locality Coordinates</b> | <b>GenBank Accession #'s</b>                 | <b>Reference</b>         |
|--------------------------------|---------------|-------------------|-----------------|-----------------------------|----------------------------------------------|--------------------------|
| <i>Amborella trichopoda</i>    |               |                   |                 | -                           | NC 005086                                    | (Goremykin et al. 2003)  |
| <i>Acorus calamus</i>          |               |                   |                 | -                           | NC_007407                                    | (Goremykin et al. 2005)  |
| <i>Phalaenopsis aphrodite</i>  |               |                   |                 | -                           | NC_007499                                    | (Chang et al. 2006)      |
| <i>Hosta ventricosa</i>        |               |                   |                 | -                           | AF508512.1                                   | (Pires & Sytsma 2002)    |
| <i>Convallaria majalis</i>     |               |                   |                 | -                           | AF508515.1                                   | (Pires & Sytsma 2002)    |
| <i>Agapanthus africanus</i>    |               |                   |                 | -                           | AF508516.1                                   | (Pires & Sytsma 2002)    |
| <i>Nolina microcarpa</i>       |               |                   |                 | -                           | AJ441178.1                                   | (Jang & Pfosser 2002)    |
| <i>Dasyilirion acrotrichum</i> |               |                   |                 | -                           | AJ441179.1                                   | (Jang & Pfosser 2002)    |
| <i>Muscari parviflorum</i>     |               |                   |                 | -                           | AJ508003.1                                   | (Pfosser et al. 2003)    |
| <i>Agave angustifolia</i>      |               |                   |                 | -                           | DQ500891.1<br>DQ500925.1                     | (Good-Avila et al. 2006) |
| <i>A attenuata</i>             |               |                   |                 | -                           | DQ500898.1<br>DQ500932.1                     | (Good-Avila et al. 2006) |
| <i>A celsii</i>                |               |                   |                 | -                           | AF508509.1                                   | (Pires and Sytsma 2002)  |
| <i>A cerulata</i>              |               |                   |                 | -                           | DQ500895.1<br>DQ500929.1                     | (Good-Avila et al. 2006) |
| <i>A deserti</i>               |               |                   |                 | -                           | DQ500894.1<br>DQ500928.1                     | (Good-Avila et al. 2006) |
| <i>A karwinskii</i>            |               |                   |                 | -                           | DQ500893.1<br>DQ500927.1                     | (Good-Avila et al. 2006) |
| <i>A kerchovei</i>             |               |                   |                 | -                           | DQ500888.1<br>DQ500922.1                     | (Good-Avila et al. 2006) |
| <i>A macracantha</i>           |               |                   |                 | -                           | DQ500892.1<br>DQ500926.1                     | (Good-Avila et al. 2006) |
| <i>A marmorata</i>             |               |                   |                 | -                           | DQ500889.1<br>DQ500923.1                     | (Good-Avila et al. 2006) |
| <i>A parviflora</i>            |               |                   |                 | -                           | AF508510.1                                   | (Pires and Sytsma 2002)  |
| <i>A petrophila</i>            |               |                   |                 | -                           | DQ500886.1<br>DQ500953.1                     | (Good-Avila et al. 2006) |
| <i>A potatorum</i>             |               |                   |                 | -                           | DQ500890.1<br>DQ500924.1                     | (Good-Avila et al. 2006) |
| <i>A schidigera</i>            |               |                   |                 | -                           | DQ500884.1<br>DQ500919.1                     | (Good-Avila et al. 2006) |
| <i>A stricta</i>               |               |                   |                 | -                           | DQ500887.1<br>DQ500921.1                     | (Good-Avila et al. 2006) |
| <i>A subsimplex</i>            |               |                   |                 | -                           | DQ500897.1<br>DQ500931.1                     | (Good-Avila et al. 2006) |
| <i>A terraccianoii</i>         |               |                   |                 | -                           | DQ500918.1<br>DQ500883.1                     | (Good-Avila et al. 2006) |
| <i>A victoriae reginae</i>     |               |                   |                 | -                           | DQ500896.1<br>DQ500930.1                     | (Good-Avila et al. 2006) |
| <i>Agave victoriae reginae</i> |               |                   |                 | -                           | AJ232447<br>AJ232570.1                       | (Pfosser and Speta 1999) |
| <i>A vilmoriniana</i>          |               |                   |                 | -                           | DQ500920.1<br>DQ500885.1                     | (Good-Avila et al. 2006) |
| <i>A lecheguilla</i> Torr.     |               |                   | Dagger Flat, TX | 29.5190 N 103.0466 W        | EU092259<br>EU092354<br>EU092448<br>EU092542 | -                        |
| <i>Anthericum liliago</i>      |               |                   |                 | -                           | AF117005.1<br>AF117033.1                     | (Meerow et al. 1999)     |
| <i>A liliago</i>               |               |                   |                 | -                           | AF508513.1                                   | (Pires and Sytsma 2002)  |

Smith et al. Patterns of diversification in *Yucca* Electronic Supplementary Material

|                                                           |                       |                                              |                          |
|-----------------------------------------------------------|-----------------------|----------------------------------------------|--------------------------|
| <i>A liliago</i>                                          | -                     | AJ232444.1<br>AJ232567.1                     | (Pfosser and Speta 1999) |
| <i>A ramosum</i>                                          | -                     | AJ232445.1<br>AJ232568.1                     | (Pfosser & Speta 1999)   |
| <i>Behnia reticulata</i>                                  | -                     | AF117007.1<br>AF117035.1                     | (Meerow et al. 1999)     |
| <i>Beschorneria calcicola</i>                             | -                     | DQ500911.1<br>DQ500951.1                     | (Good-Avila et al. 2006) |
| <i>B rigida</i>                                           | -                     | DQ500909.1<br>DQ500943.1                     | (Good-Avila et al. 2006) |
| <i>B wrightii</i>                                         | -                     | DQ500910.1<br>DQ500944.1                     | (Good-Avila et al. 2006) |
| <i>Camassia cusickii</i>                                  | -                     | AJ232450.1<br>AJ232573.1                     | (Pfosser and Speta 1999) |
| <i>C leichtlinii</i>                                      | -                     | AJ232451.1<br>AJ232574.1                     | (Pfosser and Speta 1999) |
| <i>C quamash</i>                                          | -                     | AF508511.1                                   | (Pires and Sytsma 2002)  |
| <i>Chlorogalum palmatum</i>                               | -                     | AJ232448.1<br>AJ232571.1                     | (Pfosser and Speta 1999) |
| <i>C. pomeridianum</i>                                    | -                     | AJ232449.1<br>AJ232572.1                     | (Pfosser and Speta 1999) |
| <i>Furcraea guatemalensis</i>                             | -                     | DQ500907.1<br>DQ500941.1                     | (Good-Avila et al. 2006) |
| <i>F longaeva,</i>                                        | -                     | DQ500906.1<br>DQ500940.1                     | (Good-Avila et al. 2006) |
| <i>F macdougallii</i>                                     | -                     | DQ500908.1<br>DQ500942.1                     | (Good-Avila et al. 2006) |
| <i>Hesperaloe funifera</i>                                | -                     | DQ500913.1<br>DQ500946.1                     | (Good-Avila et al. 2006) |
| <i>H funifera, (Koch) Trel.</i> Starr Nursery, Tucson, AZ | In cultivation        | EU092260<br>EU092355<br>EU092449<br>EU092543 | -                        |
| <i>Hesperoyucca whipplei</i>                              | -                     | DQ500912.1<br>DQ500945.1                     | (Good-Avila et al. 2006) |
| <i>H whipplei (Torr.) Trel</i> Elliott Reserve, CA        | 32.8683 N 117.1425 W  | EU092261<br>EU092356<br>EU092450<br>EU092544 | -                        |
| <i>H whipplei</i> Tuweep, AZ                              | 36.2111 N 113.05667 W | EU092262<br>EU092357<br>EU092451<br>EU092545 | -                        |
| <i>H whipplei</i> Temecula, CA                            | 33.4439 N 117.1767 W  | EU092263<br>EU092358<br>EU092452<br>EU092546 | -                        |
| <i>Leucocrinum montanum</i>                               | -                     | AF117003.1<br>AF117031.1                     | (Meerow et al. 1999)     |
| <i>Manfreda hauniensis</i>                                | -                     | DQ500900.1<br>DQ500934.1                     | (Good-Avila et al. 2006) |
| <i>M nanchitlensis</i>                                    | -                     | DQ500899.1<br>DQ500933.1                     | (Good-Avila et al. 2006) |
| <i>M potosina</i>                                         | -                     | DQ500901.1<br>DQ500935.1                     | (Good-Avila et al. 2006) |
| <i>Polianthes densiflora</i>                              | -                     | DQ500905.1<br>DQ500939.1                     | (Good-Avila et al. 2006) |
| <i>P geminiflora</i>                                      | -                     | DQ500903.1<br>DQ500937.1                     | (Good-Avila et al. 2006) |
| <i>P longiflora</i>                                       | -                     | DQ500902.1<br>DQ500936.1                     | (Good-Avila et al. 2006) |
| <i>P pringlei</i>                                         | -                     | DQ500904.1<br>DQ500938.1                     | (Good-Avila et al. 2006) |
| <i>Prochnyanthes mexicana</i>                             | -                     | DQ500917.1<br>DQ500952.1                     | (Good-Avila et al. 2006) |
| <i>Simethis mattiazzii</i>                                | -                     | AJ290275.1<br>AJ290309.1                     | (Chase et al. 2000)      |

Smith et al. Patterns of diversification in *Yucca* Electronic Supplementary Material

|                                                             |                       |                                              |   |
|-------------------------------------------------------------|-----------------------|----------------------------------------------|---|
| <i>Yucca aloifolia</i> L. Ft. George Island FL              | 29.6922 N 84.7878 W   | EU092264<br>EU092359<br>EU092453<br>EU092547 | - |
| <i>Y angustissima</i> Engelm. ex Trel.<br>Peach Springs, AZ | 35.561 N 113.4226 W   | EU092265<br>EU092360<br>EU092454<br>EU092548 | - |
| <i>Y arizonica</i> McKelvey KM 182, Rte 89, SON             | 30.88058 N 110.0915 W | EU092266<br>EU092361<br>EU092455<br>EU092549 | - |
| <i>Y baccata</i> Torr. Wickenburg, AZ                       | 34.2267 N 113.0699 W  | EU092267<br>EU092362<br>EU092456<br>EU092550 | - |
| <i>Y baccata</i> Torr. Blanding, UT                         | 37.7638 N 109.4028 W  | EU092268<br>EU092363<br>EU092457<br>EU092551 | - |
| <i>Y baccata</i> Torr. Zion NP, UT                          | 37.4653 N 113.1875 W  | EU092269<br>EU092364<br>EU092458<br>EU092552 | - |
| <i>Y baccata</i> Torr. Walnut Canyon, AZ                    | 35.1717 N 111.5097 W  | EU092270<br>EU092365<br>EU092459<br>EU092553 | - |
| <i>Y baccata</i> Torr. Peach Springs, AZ                    | 35.5708 N 113.4283 W  | EU092271<br>EU092366<br>EU092460<br>EU092554 | - |
| <i>Y baccata</i> Torr. Las Cruces, NM                       | 32.3077 N 106.7083 W  | EU092272<br>EU092367<br>EU092461<br>EU092555 | - |
| <i>Y baileyi</i> Wootton and Standley St Johns, AZ          | 34.6666 N 109.65 W    | EU092273<br>EU092368<br>EU092462<br>EU092556 | - |
| <i>Y baileyi</i> Wootton and Standley Winona, AZ            | 35.2291 N 111.425 W   | EU092274<br>EU092369<br>EU092463<br>EU092557 | - |
| <i>Y brevifolia</i> Engelm. Palmdale, CA                    | 34.530 N 118.065 W    | EU092275<br>EU092370<br>EU092464<br>EU092558 | - |
| <i>Y. brevifolia</i> Engelm. Shivwits, UT                   | 37.0536 N 113.8947 W  | EU092276<br>EU092465<br>EU092559             | - |
| <i>Y brevifolia</i> Engelm. Potosi Canyon NV                | 36.0238 N 115.5407 W  | EU092277<br>EU092371<br>EU092466<br>EU092560 | - |
| <i>Y brevifolia</i> Engelm. Kingston Mts, CA                | 35.77027 N 115.8355 W | EU092278<br>EU092372<br>EU092467<br>EU092559 | - |
| <i>Y campestris</i> , McKelvey Wickett, TX                  | 31.5451 N 103.0754 W  | EU092279<br>EU092373<br>EU092468<br>EU092562 | - |
| <i>Y capensis</i> Lenz San Antonio, BCS                     | 23.8095 N 110.06827 W | EU092280<br>EU092374<br>EU092469<br>EU092563 | - |

Smith et al. Patterns of diversification in *Yucca* Electronic Supplementary Material

|                                                            |                       |                                              |   |
|------------------------------------------------------------|-----------------------|----------------------------------------------|---|
| <b><i>Y capensis</i> Lenz</b> San Pedro de la Soledad, BCS | 23.4597 N 109.97407 W | EU092281<br>EU092375<br>EU092470<br>EU092564 | - |
| <b><i>Y capensis</i> Lenz</b> Sierra de San Antonio, BCS   | 23.8095 N 110.0683 W  | EU092282<br>EU092376<br>EU092471<br>EU092565 | - |
| <b><i>Y carnerosana</i> Trel.</b> San Luis Potosi, SLP     | 22.2259 N 100.8252 W  | EU092283<br>EU092377<br>EU092472<br>EU092566 | - |
| <b><i>Y carnerosana</i> Trel.</b> Dagger Flat, TX          | 29.5190 N 103.0466 W  | EU092284<br>EU092378<br>EU092473<br>EU092567 | - |
| <b><i>Y carnerosana</i> Trel.</b> Saltillo, COAH           | 25.2442 N 100.8927 W  | EU092285<br>EU092379<br>EU092474<br>EU092568 | - |
| <b><i>Y cernua</i> Keith</b> Newton, TX                    | 30.8625 N 93.8223 W   | EU092286<br>EU092380<br>EU092475<br>EU092569 | - |
| <b><i>Y constricta</i> Buckley</b> Brady, TX               | 31.0353 N 99.4227 W   | EU092287<br>EU092381<br>EU092476<br>EU092570 | - |
| <b><i>Y constricta</i> Buckley</b> Menard, TX              | 31.2475 N 97.1107 W   | EU092288<br>EU092382<br>EU092477<br>EU092571 | - |
| <b><i>Y decipiens</i> Trel.</b> Durango, DUR               | 23.9865 N 104.747 W   | EU092289<br>EU092383<br>EU092478<br>EU092572 | - |
| <b><i>Y decipiens</i> Trel.</b> Michilia DUR               | 23.5983 N 104.0026 W  | EU092290<br>EU092384<br>EU092479<br>EU092573 | - |
| <b><i>Y elata</i>, Engelm.</b> Rodeo NM                    | 31.9508 N 108.6379 W  | EU092291<br>EU092385<br>EU092480<br>EU092574 | - |
| <b><i>Y elata</i> Engelm.</b> Roosevelt Dam, AZ            | 33.6986 N 111.1986 W  | EU092292<br>EU092386<br>EU092481<br>EU092575 | - |
| <b><i>Y elata</i> Engelm.</b> Oak Creek, AZ                | 34.7185 N 111.7766 W  | EU092293<br>EU092387<br>EU092482<br>EU092576 | - |
| <b><i>Y elata</i> Engelm.</b> Sierra Vista, AZ             | 31.5474 N 110.1417 W  | EU092294<br>EU092388<br>EU092483<br>EU092577 | - |
| <b><i>Y elata</i> Engelm.</b> Hueco, TX                    | 31.8279 N 105.9419 W  | EU092295<br>EU092389<br>EU092484<br>EU092578 | - |
| <b><i>Y elata</i> Engelm.</b> Willcox Playa, AZ            | 32.2408 N 109.8181 W  | EU092296<br>EU092390<br>EU092485<br>EU092579 | - |
| <b><i>Y elata</i> Engelm.</b> Big Bend Nat'l Park, TX      | 29.6542 N 103.1026 W  | EU092297<br>EU092391<br>EU092486<br>EU092580 | - |

Smith et al. Patterns of diversification in *Yucca* Electronic Supplementary Material

|                                                                       |                       |                                              |   |
|-----------------------------------------------------------------------|-----------------------|----------------------------------------------|---|
| <b><i>Y elephantipes</i>, Regel</b> Brownsville TX                    | 25.8484 N 97.4161 W   | EU092298<br>EU092392<br>EU092487<br>EU092581 | - |
| <b><i>Y elephantipes</i> Regel</b> Yahualica, HGO                     | 20.9245 N 98.5614 W   | EU092299<br>EU092393<br>EU092488<br>EU092582 | - |
| <b><i>Y elephantipes</i> Regel</b> Rizo de Oro, CHIS                  | 15.9667 N 92.4833 W   | EU092300<br>EU092394<br>EU092489<br>EU092583 | - |
| <b><i>Y filamentosa</i> L</b> Ocala, FL                               | 29.1333 N 81.5166 W   | EU092301<br>EU092395<br>EU092490<br>EU092584 | - |
| <b><i>Y filamentosa</i> L</b> Archbold Biol. Stn., FL                 | 27.1882 N 81.337 W    | EU092302<br>EU092396<br>EU092491<br>EU092585 | - |
| <b><i>Y filifera</i> Chab.</b> Poza de Santa Clara, SLP               | 23.2502 N 100.5474 W  | EU092303<br>EU092397<br>EU092492<br>EU092586 | - |
| <b><i>Y filifera</i> Chab.</b> San Vincente, HGO                      | 19.9974 N 98.7005 W   | EU09230<br>EU092398<br>EU092493<br>EU092587  | - |
| <b><i>Y filifera</i> Chab.</b> San Jose, MICH                         | 19.5549 N 101.3907 W  | EU092305<br>EU092399<br>EU092494<br>EU092588 | - |
| <b><i>Y filifera</i> Chab.</b> Bucareli, QUE                          | 21.0517 N 99.6083 W   | EU092306<br>EU092400<br>EU092495<br>EU092589 | - |
| <b><i>Y filifera</i> Chab.</b> Morelia, MX                            | 19.8916 N 101.1149 W  | EU092307<br>EU092401<br>EU092590             | - |
| <b><i>Y glauca</i>, Nuttall</b> Sarita TX                             | 27.2166 N 97.7833 W   | EU092308<br>EU092402<br>EU092499<br>EU092591 | - |
| <b><i>Y glauca</i> Nuttall</b> Brownwood, TX                          | 31.3804 N 99.1725 W   | EU092309<br>EU092403<br>EU092496<br>EU092592 | - |
| <b><i>Y glauca</i> Nuttall</b> Hershey, NE                            | 41.1586 N 101.0026 W  | EU092310<br>EU092404<br>EU092497<br>EU092593 | - |
| <b><i>Y glauca</i> Nuttall</b> Cuervo, NM                             | 35.03429 N 104.4003 W | EU092311<br>EU092405<br>EU092498<br>EU092594 | - |
| <b><i>Y harrimaniae</i> Trelease</b> Wilson Arch, UT                  | 38.2791 N 109.375 W   | EU092312<br>EU092406<br>EU092500<br>EU092595 | - |
| <b><i>Y harrimaniae</i> Trelease</b> I-70, UT                         | 38.8166 N 111.1333 W  | EU092313<br>EU092407<br>EU092501<br>EU092596 | - |
| <b><i>Y baileyi intermedia</i> (McKelvey) Reveal</b><br>Cerrillos, NM | 35.51103 N 106.0619 W | EU092314<br>EU092408<br>EU092502<br>EU092597 | - |
| <b><i>Y baileyi intermedia</i> (McKelvey) Reveal</b>                  | 34.955 N 107.1841 W   | EU092315                                     | - |

Smith et al. Patterns of diversification in *Yucca* Electronic Supplementary Material

|                                                                       |                       |                                              |   |
|-----------------------------------------------------------------------|-----------------------|----------------------------------------------|---|
| Correo, NM                                                            |                       | EU092409<br>EU092503<br>EU092598             |   |
| <b><i>Y jaliscensis</i></b> Trelease Apango, JAL                      | 19.7833 N 103.7 W     | EU092316<br>EU092410<br>EU092504<br>EU092599 | - |
| <b><i>Y jaliscensis</i></b> Trelease Mazamitla, JAL                   | 19.9188 N 103.0273 W  | EU092317<br>EU092411<br>EU092505<br>EU092600 | - |
| <b><i>Y jaliscensis</i></b> Trelease El Izote, JAL                    | 19.6370 N 103.6488 W  | EU092318<br>EU092412<br>EU092506<br>EU092601 | - |
| <b><i>Y angustissima kanabensis</i></b> McKelvey<br>Coral Sands, UT   | 37.17932 N 112.6352 W | EU092319<br>EU092413<br>EU092507<br>EU092602 | - |
| <b><i>Y lacandonica</i></b> Pompa and Valdez<br>Chiapa de Corzo, CHIS | 16.7521 N 92.9597 W   | EU092320<br>EU092414<br>EU092508<br>EU092603 | - |
| <b><i>Y lacandonica</i></b> Pompa and Valdez<br>Berriozabal, CHIS     | 16.9280 N 93.4515 W   | EU092321<br>EU092415<br>EU092509<br>EU092604 | - |
| <b><i>Y linearifolia</i></b> Clary Galeana, NL                        | 24.9229 N 100.0678 W  | EU092322<br>EU092416<br>EU092510<br>EU092605 | - |
| <b><i>Y linearifolia</i></b> Clary Parras, COAH                       | 25.4054 N 102.0500 W  | EU092323<br>EU092511<br>EU092606             | - |
| <b><i>Y louisianensis</i></b> Trelease Silsbee, TX                    | 30.3893 N 94.2569 W   | EU092324<br>EU092417<br>EU092607             | - |
| <b><i>Y louisianensis</i></b> Trelease Mt Olive, MS                   | 31.355 N 90.9352 W    | EU092325<br>EU092418<br>EU092512<br>EU092608 | - |
| <b><i>Y periculosa</i></b> Baker Acantepec, PUE                       | 18.2092 N 97.6343 W   | EU092326<br>EU092419<br>EU092609             | - |
| <b><i>Y periculosa</i></b> Baker Rte 125, OAX                         | 18.1200 N 97.6816 W   | EU092327<br>EU092420<br>EU092610             | - |
| <b><i>Y pallida</i></b> McKelvey Comanche, TX                         | 31.8875 N 98.6458 W   | EU092328<br>EU092421<br>EU092515<br>EU092611 | - |
| <b><i>Y pallida</i></b> McKelvey Dublin, TX                           | 32.0364 N 98.4005 W   | EU092329<br>EU092422<br>EU092516<br>EU092612 | - |
| <b><i>Y periculosa</i></b> Baker Zacatepec, PUE                       | 19.3663 N 97.4345 W   | EU092330<br>EU092423<br>EU092517<br>EU092613 | - |
| <b><i>Y periculosa</i></b> Baker Azumbilla, PUE                       | 18.683 N 97.3508 W    | EU092331<br>EU092424<br>EU092518<br>EU092614 | - |
| <b><i>Y periculosa</i></b> Baker Tehuacan, PUE                        | 18.4073 N 97.4378 W   | EU092332<br>EU092425<br>EU092519<br>EU092615 | - |

Smith et al. Patterns of diversification in *Yucca* Electronic Supplementary Material

|                                                                    |                      |                                              |   |
|--------------------------------------------------------------------|----------------------|----------------------------------------------|---|
| <b><i>Y queretaroensis</i> Piña Lujan</b> Bucareli, QUE            | 21.0517 N 99.6083 W  | EU092333<br>EU092426<br>EU092520<br>EU092616 | - |
| <b><i>Y reverchonii</i> Trelease</b> Sonora, TX                    | 30.5980 N 100.6697 W | EU092334<br>EU092427<br>EU092521<br>EU092617 | - |
| <b><i>Y rigida</i> (Engelm.) Trelease</b> Torreon, DGO             | 25.1799 N 103.7166 W | EU092335<br>EU092428<br>EU092522<br>EU092618 | - |
| <b><i>Y rostrata</i>, Engelm. ex Trelease</b> Ft Stockton, TX      | 30.9578 N 102.5803 W | EU092336<br>EU092429<br>EU092523<br>EU092619 | - |
| <b><i>Y rostrata</i> Engelm. ex Trelease</b> Black Gap, TX         | 29.55 N 102.1166 W   | EU092337<br>EU092430<br>EU092524<br>EU092620 | - |
| <b><i>Y rupicola</i> Scheele</b> Kyle, TX                          | 29.9946 N 97.8869 W  | EU092338<br>EU092431<br>EU092525<br>EU092621 | - |
| <b><i>Y rupicola</i> Scheele</b> Brownwood, TX                     | 30.25 N 98.5166 W    | EU092526<br>EU092432<br>EU092622             | - |
| <b><i>Y schidigera</i> Roezl ex Ortgies</b> Cataviña, BC           | 29.8650 N 114.8427 W | EU092339<br>EU092433<br>EU092527<br>EU092623 | - |
| <b><i>Y. schidigera</i> Roezl ex Ortgies</b> Searchlight, NV       | 35.5063 N 115.1392 W | EU092340<br>EU092434<br>EU092528<br>EU092624 | - |
| <b><i>Y. schidigera</i> Roezl ex Ortgies</b> Jacumba, CA           | 32.6666 N 116.2833 W | EU092341<br>EU092435<br>EU092529<br>EU092625 | - |
| <b><i>Y schottii</i> Engelm.</b> Mt Lemmon, AZ                     | 32.3583 N 110.7181 W | EU092342<br>EU092436<br>EU092530<br>EU092626 | - |
| <b><i>Y schottii</i>, Engelm.</b> Chiricahua National Monument, AZ | 32.0049 N 109.3665 W | EU092343<br>EU092437<br>EU092531<br>EU092627 | - |
| <b><i>Y schottii</i> Engelm.</b> Florida Canyon, AZ                | 31.7634 N 110.8459 W | EU092344<br>EU092438<br>EU092532<br>EU092628 | - |
| <b><i>Y schottii</i> Engelm.</b> Cochise Stronghold, AZ            | 31.8725 N 110.0183 W | EU092345<br>EU092439<br>EU092533<br>EU092629 | - |
| <b><i>Y treculeana</i> Carriere</b> Dagger Flat, TX                | 29.5190 N 103.0466 W | EU092346<br>EU092440<br>EU092534<br>EU092630 | - |
| <b><i>Y treculeana</i> Carriere</b> Ft Stockton, TX                | 30.9578 N 102.5803 W | EU092347<br>EU092441<br>EU092535<br>EU092631 | - |
| <b><i>Y treculeana</i> Carriere</b> Las Cruces, NM                 | 32.3077 N 106.7083 W | EU092348<br>EU092442<br>EU092536<br>EU092632 | - |
| <b><i>Y treculeana</i> Carriere</b> Cuencame, DUR                  | 24.9645 N 103.7275 W | EU092349                                     | - |



Smith et al. Patterns of diversification in *Yucca* Electronic Supplementary Material

|                                                                  |                      |                                              |                          |
|------------------------------------------------------------------|----------------------|----------------------------------------------|--------------------------|
|                                                                  |                      | EU092443<br>EU092537<br>EU092633             |                          |
| <b><i>Y treculeana</i> Carriere</b> Laguna Atascosa, TX          | 26.25 N 97.35 W      | EU092350<br>EU092444<br>EU092538<br>EU092634 | -                        |
| <b><i>Yucca queretaroensis</i></b>                               | -                    | DQ500915.1<br>DQ500948.1                     | (Good-Avila et al. 2006) |
| <b><i>Yucca rigida</i></b>                                       | -                    | DQ500916.1<br>DQ500949.1                     | (Good-Avila et al. 2006) |
| <b><i>Y elata utahensis</i> (McKelvey)Reveal Snow Canyon, UT</b> | 37.2166 N 113.6458 W | EU092351<br>EU092445<br>EU092539<br>EU092635 | -                        |
| <b><i>Y valida</i> Brandegee Cd Constitucion, BCS</b>            | 24.4772 N 111.2537 W | EU092352<br>EU092446<br>EU092540<br>EU092636 | -                        |
| <b><i>Y valida</i> Brandegee La Paz BC</b>                       | 24.0555 N 110.5747 W | EU092353<br>EU092447<br>EU092541<br>EU092637 | -                        |

**Table S3: ParaFit cospeciation analysis of congruence between cpDNA and AFLP datasets. Boldface entries show taxa that contributed significantly to the overall congruence between data sets, based on both the F1 and F2 tests.**

| Sample                                                  | F1             | P1          | F2             | P2          |
|---------------------------------------------------------|----------------|-------------|----------------|-------------|
| <b><i>Hesperoyucca whipplei</i> Elliott Reserve, CA</b> | <b>0.76453</b> | <b>0.01</b> | <b>0.03403</b> | <b>0.01</b> |
| <b><i>H. whipplei</i> Temecula, CA</b>                  | <b>0.77248</b> | <b>0.01</b> | <b>0.03438</b> | <b>0.01</b> |
| <i>Y. angustissima</i> Peach Springs, AZ                | 0.11688        | 0.41        | 0.0052         | 0.27        |
| <b><i>Y. arizonica</i> KM 182, Sonora Rte 89, SON</b>   | <b>0.19523</b> | <b>0.04</b> | <b>0.00869</b> | <b>0.02</b> |
| <b><i>Y. baccata</i> Wickenburg, AZ</b>                 | <b>0.24056</b> | <b>0.02</b> | <b>0.01071</b> | <b>0.01</b> |
| <i>Y. baccata</i> Blanding, UT                          | 0.08158        | 0.55        | 0.00363        | 0.32        |
| <b><i>Y. baccata</i> Zion NP, UT</b>                    | <b>0.26436</b> | <b>0.02</b> | <b>0.01177</b> | <b>0.01</b> |
| <b><i>Y. baccata</i> Walnut Canyon, AZ</b>              | <b>0.26707</b> | <b>0.02</b> | <b>0.01189</b> | <b>0.01</b> |
| <b><i>Y. baccata</i> Peach Springs, AZ</b>              | <b>0.23194</b> | <b>0.04</b> | <b>0.01032</b> | <b>0.03</b> |
| <i>Y. baccata</i> Las Cruces, NM                        | 0.07954        | 0.5         | 0.00354        | 0.34        |
| <i>Y. baileyi</i> St Johns, AZ                          | 0.12305        | 0.36        | 0.00548        | 0.24        |
| <i>Y. baileyi</i> Winona, AZ                            | 0.12339        | 0.33        | 0.00549        | 0.18        |
| <i>Y. brevifolia</i> Palmdale, CA                       | 0.10778        | 0.07        | 0.0048         | 0.05        |
| <i>Y. brevifolia</i> Potosi Canyon, NV                  | 0.09681        | 0.14        | 0.00431        | 0.11        |
| <i>Y. brevifolia</i> Kingston Mts, CA                   | 0.12125        | 0.16        | 0.0054         | 0.09        |
| <i>Y. capensis</i> San Antonio, BCS                     | -0.08636       | 0.99        | -0.00384       | 0.99        |
| <b><i>Y. capensis</i> San Pedro de la Soledad, BCS</b>  | <b>0.26944</b> | <b>0.03</b> | <b>0.01199</b> | <b>0.02</b> |
| <i>Y. carnerosana</i> San Luis Potosi, SLP              | 0.09271        | 0.19        | 0.00413        | 0.12        |
| <i>Y. carnerosana</i> Dagger Flat, Big Bend NP, TX      | 0.06986        | 0.27        | 0.00311        | 0.15        |
| <i>Y. carnerosana</i> Saltillo, COAH                    | 0.10391        | 0.12        | 0.00463        | 0.07        |
| <b><i>Y. cernua</i> Newton, TX</b>                      | <b>0.18288</b> | <b>0.04</b> | <b>0.00814</b> | <b>0.01</b> |
| <b><i>Y. constricta</i>, Brady, TX</b>                  | <b>0.31838</b> | <b>0.01</b> | <b>0.01417</b> | <b>0.01</b> |
| <b><i>Y. constricta</i> Menard, TX</b>                  | <b>0.24706</b> | <b>0.01</b> | <b>0.011</b>   | <b>0.01</b> |
| <i>Y. decipiens</i> Durango, DUR                        | 0.07797        | 0.3         | 0.00347        | 0.14        |
| <i>Y. decipiens</i> Michilia, DUR                       | 0.07406        | 0.28        | 0.0033         | 0.15        |
| <b><i>Y. elata</i> Rodeo, NM</b>                        | <b>0.47556</b> | <b>0.03</b> | <b>0.02117</b> | <b>0.02</b> |
| <b><i>Y. elata</i> Roosevelt Dam, AZ</b>                | <b>0.43284</b> | <b>0.01</b> | <b>0.01927</b> | <b>0.01</b> |
| <b><i>Y. elata</i> Oak Creek, AZ</b>                    | <b>0.4784</b>  | <b>0.01</b> | <b>0.02129</b> | <b>0.01</b> |
| <b><i>Y. elata</i> Sierra Vista, AZ</b>                 | <b>0.48444</b> | <b>0.02</b> | <b>0.02156</b> | <b>0.01</b> |
| <b><i>Y. elata</i> Hueco, TX</b>                        | <b>0.7878</b>  | <b>0.02</b> | <b>0.03506</b> | <b>0.01</b> |
| <b><i>Y. elata</i> Willcox Playa, AZ</b>                | <b>0.49356</b> | <b>0.01</b> | <b>0.02197</b> | <b>0.01</b> |
| <i>Y. elephantipes</i> , Brownsville TX                 | 0.08677        | 0.23        | 0.00386        | 0.06        |
| <i>Y. elephantipes</i> Yahuualica, HGO                  | 0.1003         | 0.18        | 0.00446        | 0.07        |
| <b><i>Y. elephantipes</i> Rizo de Oro, CHIS</b>         | <b>0.26529</b> | <b>0.01</b> | <b>0.01181</b> | <b>0.01</b> |
| <b><i>Y. filamentosa</i> Ocala, FL</b>                  | <b>0.41592</b> | <b>0.01</b> | <b>0.01851</b> | <b>0.01</b> |
| <b><i>Y. filamentosa</i> Archbold Biol. Stn., FL</b>    | <b>0.48507</b> | <b>0.01</b> | <b>0.02159</b> | <b>0.01</b> |
| <b><i>Y. filifera</i> Poza de Santa Clara, SLP</b>      | <b>0.37011</b> | <b>0.01</b> | <b>0.01647</b> | <b>0.01</b> |
| <i>Y. filifera</i> San Vincente, HGO                    | 0.12012        | 0.12        | 0.00535        | 0.08        |
| <i>Y. filifera</i> San Jose, MICH                       | 0.12454        | 0.09        | 0.00554        | 0.04        |
| <i>Y. filifera</i> Bucareli, QUE                        | 0.10745        | 0.13        | 0.00478        | 0.06        |
| <b><i>Y. glauca</i> Brownwood, TX</b>                   | <b>0.3847</b>  | <b>0.03</b> | <b>0.01712</b> | <b>0.02</b> |

| Sample                                             | F1             | P1          | F2             | P2          |
|----------------------------------------------------|----------------|-------------|----------------|-------------|
| <b><i>Y. glauca</i> Hershey, NE</b>                | <b>0.55127</b> | <b>0.01</b> | <b>0.02454</b> | <b>0.01</b> |
| <b><i>Y. glauca</i> Cuervo, NM</b>                 | <b>0.75818</b> | <b>0.01</b> | <b>0.03375</b> | <b>0.01</b> |
| <b><i>Y. glauca</i>, Sarita TX</b>                 | <b>0.32554</b> | <b>0.04</b> | <b>0.01449</b> | <b>0.01</b> |
| <i>Y. harrimaniae</i> Wilson Arch, UT              | 0.11286        | 0.45        | 0.00502        | 0.29        |
| <i>Y. harrimaniae</i> I-70, UT                     | 0.11936        | 0.45        | 0.00531        | 0.31        |
| <b><i>Y. intermedia</i> Cerillos, NM</b>           | <b>0.41326</b> | <b>0.03</b> | <b>0.01839</b> | <b>0.01</b> |
| <b><i>Y. intermedia</i> Correo, NM</b>             | <b>0.44716</b> | <b>0.01</b> | <b>0.0199</b>  | <b>0.01</b> |
| <i>Y. jaliscensis</i> Apango, JAL                  | 0.07412        | 0.37        | 0.0033         | 0.21        |
| <b><i>Y. jaliscensis</i> Mazamitla, JAL</b>        | <b>0.37958</b> | <b>0.01</b> | <b>0.01689</b> | <b>0.01</b> |
| <b><i>Y. jaliscensis</i> El Izote, JAL</b>         | <b>0.36919</b> | <b>0.01</b> | <b>0.01643</b> | <b>0.01</b> |
| <i>Y. angustissima kanabensis</i> Coral Sands, UT  | 0.11367        | 0.38        | 0.00506        | 0.27        |
| <b><i>Y. lacandonica</i> Chiapa de Corzo, CHIS</b> | <b>0.43445</b> | <b>0.01</b> | <b>0.01934</b> | <b>0.01</b> |
| <b><i>Y. lacandonica</i> Berriozabal, CHIS</b>     | <b>0.40928</b> | <b>0.01</b> | <b>0.01822</b> | <b>0.01</b> |
| <i>Y. linearifolia</i> Galeana, NL                 | 0.10563        | 0.14        | 0.0047         | 0.09        |
| <i>Y. linearifolia</i> Parras, COAH                | 0.10527        | 0.2         | 0.00469        | 0.06        |
| <b><i>Y. louisianensis</i> Silsbee, TX</b>         | <b>0.44866</b> | <b>0.01</b> | <b>0.01997</b> | <b>0.01</b> |
| <b><i>Y. louisianensis</i> Mt Olive, MS</b>        | <b>0.33767</b> | <b>0.01</b> | <b>0.01503</b> | <b>0.01</b> |
| <b><i>Y. periculosa</i> Acantepec, PUE</b>         | <b>0.14027</b> | <b>0.05</b> | <b>0.00624</b> | <b>0.02</b> |
| <b><i>Y. periculosa</i> Rte 125, OAX</b>           | <b>0.21305</b> | <b>0.05</b> | <b>0.00948</b> | <b>0.02</b> |
| <b><i>Y. pallida</i> Comanche, TX</b>              | <b>0.19252</b> | <b>0.05</b> | <b>0.00857</b> | <b>0.04</b> |
| <b><i>Y. pallida</i> Dublin, TX</b>                | <b>0.20548</b> | <b>0.05</b> | <b>0.00915</b> | <b>0.03</b> |
| <b><i>Y. periculosa</i> Tehuacan, PUE</b>          | <b>0.36977</b> | <b>0.01</b> | <b>0.01646</b> | <b>0.01</b> |
| <i>Y. periculosa</i> Zacatepec, PUE                | 0.0922         | 0.19        | 0.0041         | 0.11        |
| <i>Y. periculosa</i> Azumbilla, PUE                | 0.14034        | 0.11        | 0.00625        | 0.04        |
| <b><i>Y. reverchoni</i> Sonora, TX</b>             | <b>0.1634</b>  | <b>0.05</b> | <b>0.00727</b> | <b>0.02</b> |
| <i>Y. rigida</i> Torreon, DGO                      | 0.07075        | 0.54        | 0.00315        | 0.23        |
| <i>Y. rostrata</i> , Ft Stockton, TX               | 0.08271        | 0.34        | 0.00368        | 0.23        |
| <i>Y. rostrata</i> Black Gap, TX                   | 0.07809        | 0.36        | 0.00348        | 0.24        |
| <i>Y. rupicola</i> Kyle, TX                        | 0.21526        | 0.08        | 0.00958        | 0.06        |
| <i>Y. rupicola</i> Brownwood, TX                   | 0.20444        | 0.09        | 0.0091         | 0.05        |
| <b><i>Y. schidigera</i> Cataviña, BC</b>           | <b>0.23869</b> | <b>0.02</b> | <b>0.01062</b> | <b>0.01</b> |
| <b><i>Y. schottii</i> Mt Lemmon, AZ</b>            | <b>0.33549</b> | <b>0.02</b> | <b>0.01493</b> | <b>0.01</b> |
| <b><i>Y. schottii</i>, Chiricahua NM, AZ</b>       | <b>0.27752</b> | <b>0.02</b> | <b>0.01235</b> | <b>0.01</b> |
| <b><i>Y. schottii</i> Florida Canyon, AZ</b>       | <b>0.23964</b> | <b>0.01</b> | <b>0.01067</b> | <b>0.01</b> |
| <b><i>Y. treculeana</i> Dagger Flat, TX</b>        | <b>0.34371</b> | <b>0.01</b> | <b>0.0153</b>  | <b>0.01</b> |
| <b><i>Y. treculeana</i>, Ft Stockton, TX</b>       | <b>0.34931</b> | <b>0.01</b> | <b>0.01555</b> | <b>0.01</b> |
| <i>Y. treculeana</i> Las Cruces, NM                | 0.14369        | 0.14        | 0.0064         | 0.07        |
| <i>Y. treculeana</i> Cuencame, DUR                 | 0.08922        | 0.09        | 0.00397        | 0.06        |
| <i>Y. treculeana</i> Laguna Atascosa, TX           | 0.0962         | 0.32        | 0.00428        | 0.16        |
| <i>Y. elata utahensis</i> Snow Canyon, UT          | 0.14093        | 0.31        | 0.00627        | 0.16        |
| <i>Y. valida</i> Cd Constitucion, BCS              | 0.18988        | 0.12        | 0.00845        | 0.05        |
| <b><i>Y. valida</i> La Paz, BC</b>                 | <b>0.23497</b> | <b>0.04</b> | <b>0.01046</b> | <b>0.02</b> |

Table S4: Node ages and support values. Node numbers refer to labeled nodes in Figure S1. Bootstrap supports refer to the support seen in the bootstrap consensus tree, including all compatible sub-grouping. Nodes labeled “NR” were not represented in the bootstrap consensus tree

| Node | Bayes Posterior | Bootstrap | Node Age | Node | Bayes Posterior | Bootstrap | Node Age |
|------|-----------------|-----------|----------|------|-----------------|-----------|----------|
| 1    | NA              | NA        | 105.50   | 42   | 6               | NR        | 4.48     |
| 2    | 100             | 100       | 94.00    | 43   | <1              | NR        | 5.12     |
| 3    | 100             | 100       | 62.50    | 44   | 2               | NR        | 4.48     |
| 4    | 99              | 88        | 43.52    | 45   | 22              | NR        | 3.55     |
| 5    | 48              | NR        | 38.90    | 46   | 79              | 43        | 2.38     |
| 6    | 71              | NR        | 34.74    | 47   | 1               | NR        | 5.14     |
| 7    | 100             | 100       | 5.48     | 48   | <1              | NR        | 5.12     |
| 8    | 98              | 88        | 2.54     | 49   | <1              | NR        | 3.00     |
| 9    | 100             | 94        | 20.66    | 50   | 3               | NR        | 1.96     |
| 10   | 99              | 88        | 17.69    | 51   | 3               | NR        | 1.98     |
| 11   | 100             | 95        | 11.95    | 52   | <1              | NR        | 4.72     |
| 12   | 100             | 91        | 6.89     | 53   | 4               | NR        | 3.45     |
| 13   | 100             | 66        | 4.18     | 54   | 29              | 55        | 4.17     |
| 14   | 100             | 68        | 2.66     | 55   | <1              | NR        | 4.62     |
| 15   | 100             | 68        | 14.48    | 56   | 3               | NR        | 3.85     |
| 16   | 45              | 22        | 12.96    | 57   | 8               | NR        | 2.63     |
| 17   | 36              | 26        | 11.29    | 58   | 86              | 48        | 1.06     |
| 18   | 100             | 93        | 6.85     | 59   | 59              | NR        | 9.52     |
| 19   | 100             | 99        | 1.13     | 60   | 87              | 66        | 6.41     |
| 20   | 100             | 68        | 5.22     | 61   | 32              | NR        | 1.75     |
| 21   | 100             | 70        | 3.59     | 62   | 77              | NR        | 5.84     |
| 22   | 54              | NR        | 6.34     | 63   | 7               | NR        | 5.21     |
| 23   | 34              | NR        | 5.32     | 64   | 10              | NR        | 4.65     |
| 24   | 49              | NR        | 3.88     | 65   | 1               | NR        | 3.65     |
| 25   | 68              | 67        | 1.31     | 66   | 0               | NR        | 2.20     |
| 26   | 100             | 99        | 1.41     | 67   | 2               | NR        | 1.14     |
| 27   | 59              | 34        | 11.43    | 68   | 4               | NR        | 0.89     |
| 28   | 100             | 89        | 9.07     | 69   | <1              | NR        | 1.79     |
| 29   | 99              | 49        | 7.70     | 70   | 4               | NR        | 0.79     |
| 30   | 24              | NR        | 7.03     | 71   | 4               | NR        | 0.78     |
| 31   | 26              | 19        | 5.81     | 72   | 3               | NR        | 1.36     |
| 32   | 99              | 83        | 5.34     | 73   | <1              | NR        | 2.88     |
| 33   | 77              | 37        | 7.82     | 74   | 3               | NR        | 2.28     |
| 34   | 100             | 58        | 6.15     | 75   | 99              | 60        | 1.22     |
| 35   | 77              | NR        | 1.10     | 76   | 23              | 36        | 0.77     |
| 36   | 34              | NR        | 5.59     | 77   | 21              | NR        | 0.44     |
| 37   | 95              | NR        | 3.93     | 78   | 1               | NR        | 3.31     |
| 38   | 21              | NR        | 2.96     | 79   | 22              | 5         | 2.44     |
| 39   | 22              | NR        | 2.25     | 80   | 79              | 61        | 1.38     |
| 40   | 2               | 2         | 4.21     | 81   | 12              | NR        | 1.02     |
| 41   | 37              | NR        | 2.91     | 82   | 14              | NR        | 0.55     |

Smith et al. Patterns of diversification in *Yucca* Electronic Supplementary Material

| <b>Node</b> | <b>Bayes Posterior</b> | <b>Bootstrap</b> | <b>Node Age</b> | <b>Node</b> | <b>Bayes Posterior</b> | <b>Bootstrap</b> | <b>Node Age</b> |
|-------------|------------------------|------------------|-----------------|-------------|------------------------|------------------|-----------------|
| 83          | 14                     | NR               | 0.54            | 117         | 15                     | NR               | 0.74            |
| 84          | 62                     | 44               | 2.73            | 118         | 15                     | NR               | 0.92            |
| 85          | 96                     | 42               | 2.12            | 119         | 21                     | 1                | 3.78            |
| 86          | 1                      | NR               | 1.58            | 120         | 7                      | NR               | 1.79            |
| 87          | 19                     | NR               | 1.12            | 121         | 11                     | NR               | 1.07            |
| 88          | 90                     | 44               | 0.45            | 122         | 11                     | NR               | 0.78            |
| 89          | 5                      | NR               | 1.92            | 123         | 76                     | 4                | 3.37            |
| 90          | 5                      | NR               | 0.56            | 124         | 16                     | 2                | 3.06            |
| 91          | <1                     | NR               | 1.08            | 125         | 24                     | NR               | 1.66            |
| 92          | 5                      | NR               | 0.58            | 126         | 51                     | 7                | 0.86            |
| 93          | <1                     | NR               | 1.57            | 127         | 24                     | NR               | 0.48            |
| 94          | 5                      | NR               | 0.60            | 128         | 14                     | 2                | 2.77            |
| 95          | <1                     | NR               | 1.16            | 129         | 35                     | NR               | 1.79            |
| 96          | 5                      | NR               | 0.76            | 130         | 55                     | 3                | 1.17            |
| 97          | 33                     | 34               | 3.49            | 131         | 27                     | NR               | 0.61            |
| 98          | 86                     | 24               | 2.40            | 132         | 57                     | 11               | 0.66            |
| 99          | 67                     | 15               | 1.79            | 133         | 6                      | NR               | 2.47            |
| 100         | 99                     | 59               | 0.62            | 134         | 6                      | 8                | 2.08            |
| 101         | 58                     | 31               | 1.15            | 135         | 91                     | 47               | 0.98            |
| 102         | 54                     | 31               | 2.19            | 136         | 3                      | 7                | 1.71            |
| 103         | 9                      | NR               | 0.80            | 137         | 3                      | NR               | 0.80            |
| 104         | 6                      | NR               | 1.83            | 138         | <1                     | NR               | 1.53            |
| 105         | 6                      | NR               | 1.83            | 139         | <1                     | NR               | 1.10            |
| 106         | 2                      | NR               | 1.52            | 140         | 3                      | NR               | 0.72            |
| 107         | 9                      | NR               | 0.71            | 141         | 3                      | NR               | 0.59            |
| 108         | 9                      | NR               | 1.24            | 142         | 3                      | NR               | 0.77            |
| 109         | 99                     | 66               | 0.79            | 143         | <1                     | NR               | 1.18            |
| 110         | 20                     | NR               | 0.57            | 144         | 4                      | NR               | 0.60            |
| 111         | 20                     | NR               | 0.34            | 145         | <1                     | NR               | 1.16            |
| 112         | 29                     | 1                | 4.11            | 146         | <1                     | NR               | 0.78            |
| 113         | 76                     | 19               | 2.45            | 145         | <1                     | NR               | 1.16            |
| 114         | 97                     | 41               | 0.74            | 146         | <1                     | NR               | 0.78            |
| 115         | 24                     | 12               | 1.48            | 147         | 3                      | NR               | 0.44            |
| 116         | 97                     | 41               | 0.74            | 148         | 3                      | NR               | 0.64            |

**Supplemental Online Material: Literature Cited**

- Althoff, D. M., Segraves, K. A., et al. 2006 Patterns of speciation in the yucca moths: parallel species radiations within the *Tegeticula yuccasella* species complex. *Syst Biol* **55**, 398-410.
- Baker, R. H. & DeSalle, R. 1997 Multiple sources of character information and the phylogeny of Hawaiian drosophilids. *Syst Biol* **46**, 654-673.
- Baldwin, B. G. & Sanderson, M. J. 1998 Age and rate of diversification of the Hawaiian silversword alliance (Compositae). *Proc Nat'l Acad Sci USA* **95**, 9402-9405.
- Chang, C.-C., Lin, H.-C., et al. 2006 The chloroplast genome of *Phalaenopsis aphrodite* (Orchidaceae): comparative analysis of evolutionary rate with that of grasses and Its phylogenetic implications. *Mol Biol Evol* **23**, 279-291.
- Charleston, M. A. & Perkins, S. L. 2006 Traversing the tangle: Algorithms and applications for cophylogenetic studies. *J Biomed Inform* **39**, 62-71.
- Chase, M. W., De Bruijn, A. Y., et al. 2000 Phylogenetics of Asphodelaceae (Asparagales): an analysis of plastid rbcL and trnL-F DNA sequences. *Ann Bot* **86**, 935-951.
- Demesure, B., Sodzi, N., et al. 1995 A set of universal primers for amplification of polymorphic and non-coding regions of mitochondrial and chloroplast DNA in plants. *Mol Ecol* **4**, 129-131.
- Downie, S. R. & Katz-Downie, D. S. 1999 Phylogenetic analysis of chloroplast rps16 intron sequences reveals relationships within the woody southern African Apicaceae subfamily Apiodeae. *Can J Bot* **77**, 1120-1135.

Doyle, J. J. 1997 Trees within trees: genes and species, molecules and morphology. *Syst Biol* **46**, 537-553.

Good-Avila, S. V., Souza, V., et al. 2006 Timing and rate of speciation in *Agave* (Agavaceae). *Proc Nat'l Acad Sci USA* **103**, 9124-9129.

Goremykin, V. V., Hirsch-Ernst, K. I., et al. 2003 Analysis of the *Amborella trichopoda* chloroplast genome sequence suggests that *Amborella* is not a basal angiosperm. *Mol Biol Evol* **20**, 1499-1505.

Goremykin, V. V., Holland, B., et al. 2005 Analysis of *Acorus calamus* chloroplast genome and its phylogenetic implications. *Mol Biol Evol* **22**, 1813-22.

Hanson, M. A. 1993 Dispersed unidirectional introgression from *Yucca schidigera* into *Yucca baccata* (Agavaceae). In *Graduate Faculty of Botany*, vol. Ph.D. Claremont, California: The Claremont Graduate School.

Huelsenbeck, J. P. & Ronquist, F. 2001 MRBAYES: Bayesian inference of phylogeny. *Bioinformatics* **17**, 754-755.

Jang, C. G. & Pfosser, M. 2002 Phylogenetics of Ruscaceae *sensu lato* based on plastid *rbcl* and *trnL-F* DNA sequences. *Stapfia* **80**, 333-348.

Legendre, P., Desdevises, Y., et al. 2002 A statistical test for host-parasite coevolution. *Syst Biol* **51**, 217-234.

Lewis, P. O. 2001 A likelihood approach to estimating phylogeny from discrete morphological character data. *Syst Biol* **50**, 913-925.

Maddison, W. P. 1997 Gene trees in species trees. *Syst Biol* **46**, 523-536.

Maddison, W. P. & Maddison, D. R. 2006 Mesquite: A modular system for evolutionary analysis.

- Magallón, S. & Sanderson, M. J. 2001 Absolute diversification rates in angiosperm clades. *Evolution* **55**, 1762-1780.
- Meerow, A. W., Fay, M. F., et al. 1999 Systematics of Amaryllidaceae based on cladistic analysis of plastid sequence data. *Am. J. Bot.* **86**, 1325-1345.
- Page, R. D. M. & Charleston, M. A. 1998 Trees within trees: phylogeny and historical associations. *TREE* **13**, 356-359.
- Pellmyr, O., Segraves, K. A., et al. 2007 The phylogeny of yuccas. *Mol Phylogenet Evol* **43**, 493-501.
- Penton, E. H. & Crease, T. J. 2004 Evolution of the transposable element Pokey in the ribosomal DNA of species in the subgenus *Daphnia* (Crustacea : Cladocera). *Mol Biol Evol* **21**, 1727-1739.
- Pfossner, M. & Speta, F. 1999 Phylogenetics of Hyacinthaceae based on plastid DNA sequences. *Ann Mo Bot Gard* **86**, 852-875.
- Pfossner, M., Wetschnig, W., et al. 2003 Phylogenetic relationships among genera of Massonieae (Hyacinthaceae) inferred from plastid DNA and seed morphology. *J Plant Res* **116**, 115-32.
- Pires, J. C. & Sytsma, K. J. 2002 A phylogenetic evaluation of a biosystematic framework: *Brodiaea* and related petaloid monocots (Themidaceae). *Am J Bot* **89**, 1342-1359.
- Posada, D. & Crandall, K. A. 1998 Modeltest: testing the model of DNA substitution. *Bioinformatics* **14**, 817-818.
- Pybus, O. G., Rambaut, A., et al. 2002 New inferences from tree shape: numbers of missing taxa and population growth rates. *Syst Biol* **51**, 881-888.
- Rambaut, A. 2002 Phyl-O-Gen. Oxford: Oxford University.



- Rambaut, A. & Drummond, A. J. 2005 TreeStat. Oxford: Oxford University.
- Ronquist, F. 1997 Phylogenetic approaches in coevolution and biogeography. *Zool Scr* **26**, 313-322.
- Sanderson, M. J. 1997 A nonparametric approach to estimating divergence times in the absence of rate constancy. *Mol Biol Evol* **14**, 1218-1231.
- Sanderson, M. J. 2002 Estimating absolute rates of molecular evolution and divergence times: a penalized likelihood approach. *Mol Biol Evol* **19**, 101-109.
- Sanderson, M. J. & Donoghue, M. J. 1994 Shifts in diversification rate with the origin of angiosperms. *Science* **264**, 1590-1593.
- Sanderson, M. J. & Doyle, J. 2001 Sources of error and confidence intervals in estimating the age of angiosperms from rbcL and 18S rDNA data. *Am J Bot* **88**, 1499-1516.
- Schluter, D. 2000 *The Ecology of Adaptive Radiation*. Oxford Series in Ecology and Evolution. New York: Oxford University Press.
- Simmons, M. P. & Ochoterena, H. 2000 Gaps as characters in sequence-based phylogenetic analyses. *Syst Biol* **49**, 369-381.
- Slowinski, J. B. & Guyer, C. 1989 Testing the stochasticity of patterns of organismal diversity: an improved null mode. *Am Nat* **134**, 907-921.
- Sorenson, M. D. 1999 TreeRot. Boston, MA: Boston University.
- Stevens, J. 2004 Computational aspects of host-parasite phylogenies. *Briefings in Bioinformatics* **5**, 339-349.
- Swofford, D. 2002 PAUP\*. Sunderland, Mass: Sinauer Associates.
- Taberlet, P., Gielly, L., et al. 1991 Universal primers for amplification of three non-coding regions of chloroplast DNA. *Plant Mol. Biol.* **17**, 1105-1109.

Smith et al. Patterns of diversification in *Yucca* Electronic Supplementary Material

Wikström, N., Savolainen, V., et al. 2001 Evolution of the angiosperms: calibrating the family tree. *Proc R Soc Lond B Biol Sci* **268**, 2211-2220.

**Supplemental Online Materials: Figure Legends:**

Supplemental Figure S1: Complete chronogram of the Agavaceae based on Bayes consensus tree derived from 153 cpDNA sequences from the trnL gene and the the trnL – trnF intergenic spacer. *Amborella trichopoda* was used to root the topology and was pruned in the r8s analysis. Node numbers refer to labels and support indices in Supplemental Online Material Table S4.

Supplemental Figure S2: Chronograms of the pruned topologies used to calculate speciation rates in *Agave sensu latissimus* and *Yucca*. Underlying topology is based the Bayes consensus tree of the 153 taxa trnL-trnF cpDNA sequence dataset shown in figure S1. Taxa were pruned from the underlying topology so as to include only one individual per species and (in *Yucca*) to maximize agreement with the presumed species tree inferred from AFLP data.

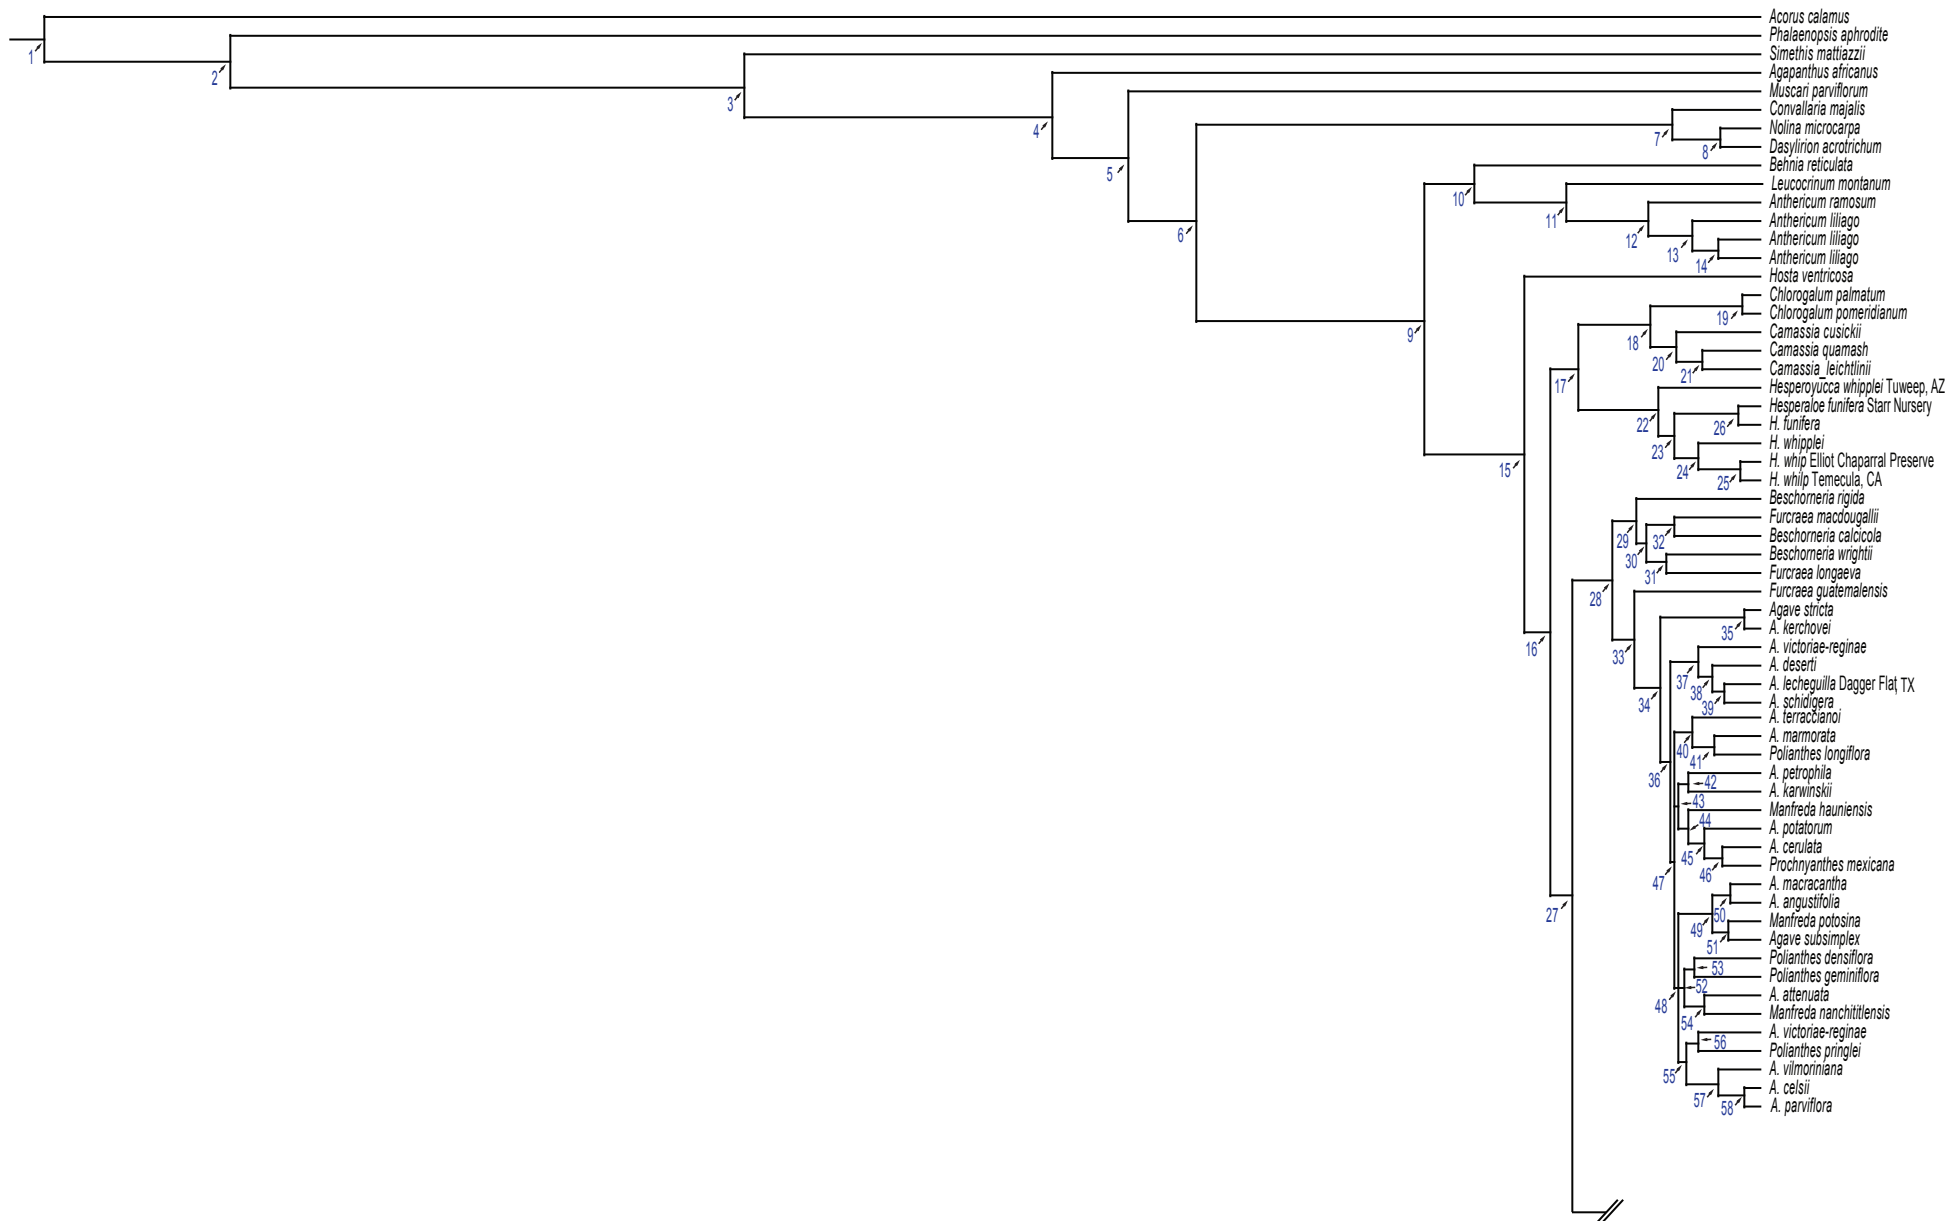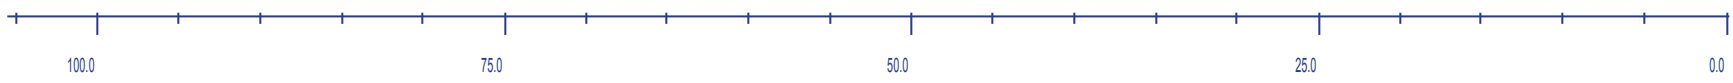

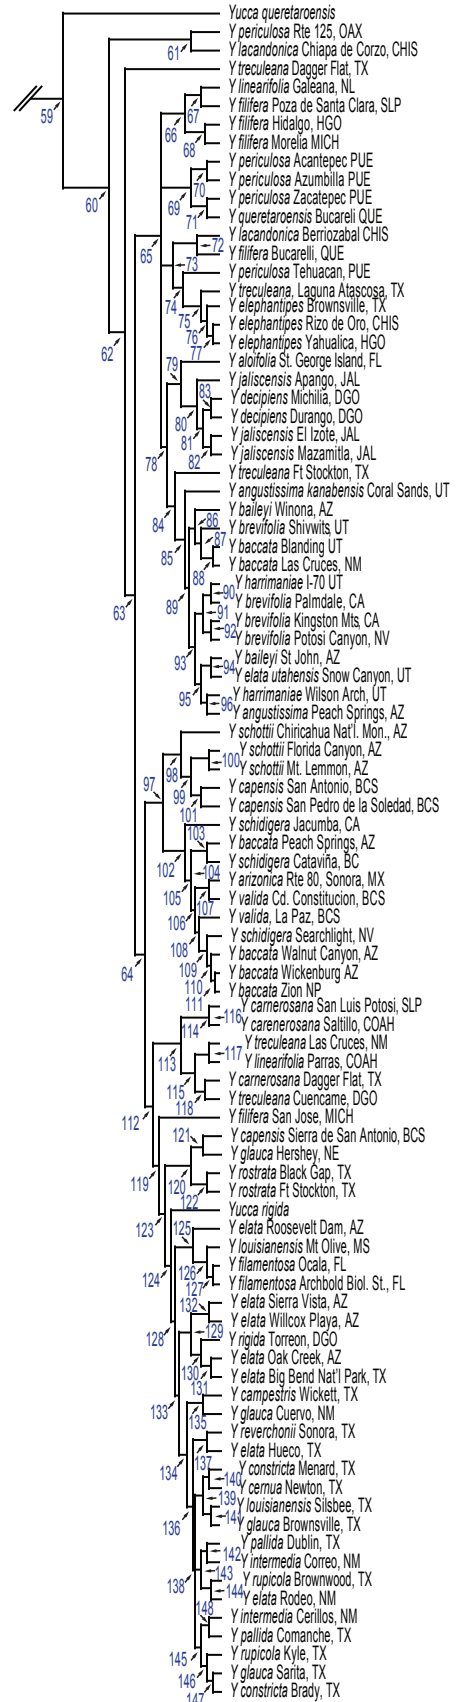

25.0

0.0

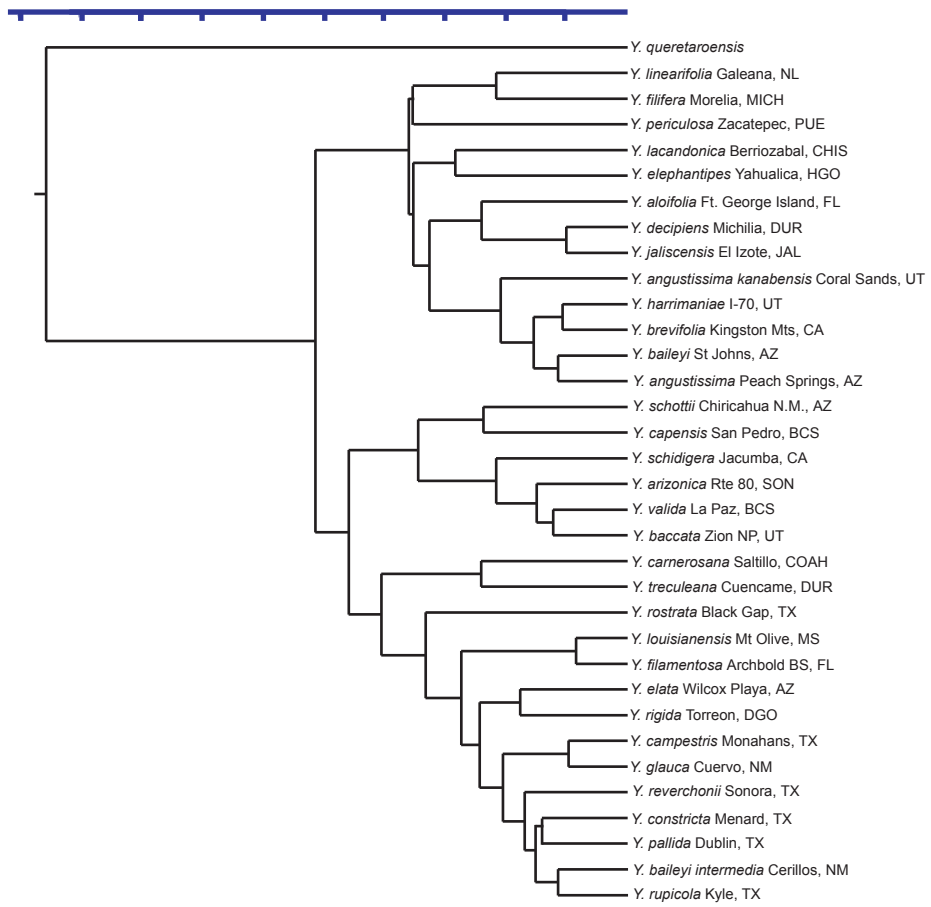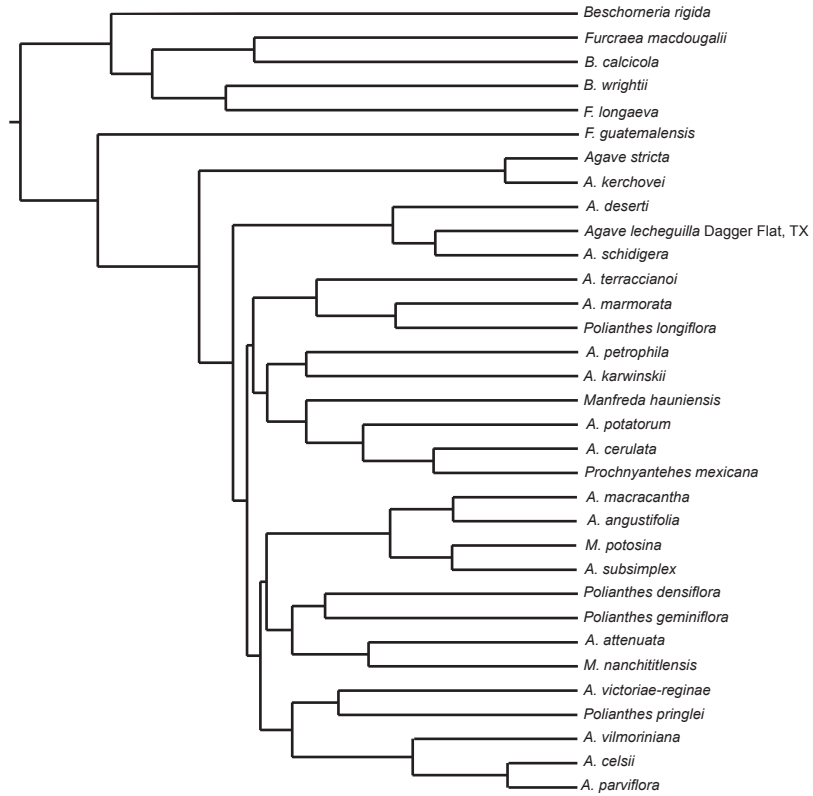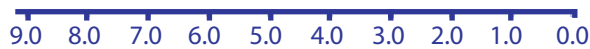

Supplement: rspb20071405s03.pdf [file rspb20071405s03.pdf]
